# Supplementary material for: Preclinical Pharmacokinetic Studies of a Novel Diuretic Inhibiting Urea Transporters
Source: MDPI journal article supplement (doi:10.3390/molecules27082451), 2022-04-11
Supplement: s1 [file s1]

# Preclinical Pharmacokinetic Studies of a Novel Diuretic Inhibiting Urea Transporters

Yue Xu <sup>1</sup>, Hang Zhang <sup>1</sup>, Nannan Li <sup>1</sup>, Wen Ma <sup>2</sup>, Shuyuan Wang <sup>1</sup>, Jianguo Sun <sup>3</sup> and Baoxue Yang <sup>1,\*</sup>

<sup>1</sup> State Key Laboratory of Natural and Biomimetic Drugs, Department of Pharmacology, School of Basic Medical Sciences, Peking University, Beijing, 100191, China; yue\_xu@bjmu.edu.cn (Y.X.); hangzhang@bjmu.edu.cn (H.Z.); 1610305107@pku.edu.cn (N.L.); 1911110073@bjmu.edu.cn (S.W.)

<sup>2</sup> State Key Laboratory of Natural and Biomimetic Drugs, School of Pharmaceutical Sciences, Peking University, Beijing, 100191, China; wen.ma@bjmu.edu.cn

<sup>3</sup> Key Lab of Drug Metabolism and Pharmacokinetics, State Key Laboratory of Natural Medicines, China Pharmaceutical University, 24 Tongjiaxiang Street, Nanjing, 210009, Jiangsu, China; jgsun@cpu.edu.cn

\* Correspondence: baoxue@bjmu.edu.cn; Tel.: +86-10-8280-5559

## Supplementary materials

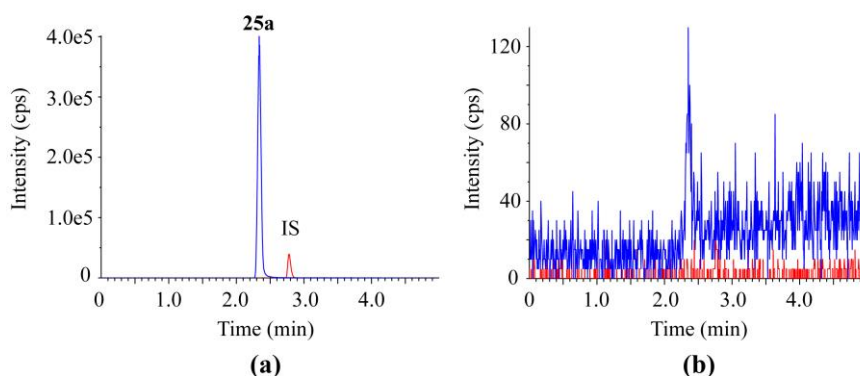

**Figure S1.** Evaluation of carry-over effect. Representative chromatograms of **25a** and IS in (a) ULOQ sample (1000 ng/mL) in rat plasma; (b) double blank sample following the ULOQ.

**Table S1.** Dilution integrity test for **25a** in rat plasma, urine, feces and bile. Data were presented as the mean  $\pm$  SD (n = 6).

| Matrix | Nominal Conc.<br>(ng/mL) | Measured Conc.<br>(ng/mL) | RE (%) | CV (%) |
|--------|--------------------------|---------------------------|--------|--------|
| Plasma | 10,000                   | 10,450.0 $\pm$ 236.3      | 4.5    | 2.3    |
| Urine  | 10,000                   | 11,416.7 $\pm$ 219.2      | 14.2   | 1.9    |
| Feces  | 10,000                   | 9201.7 $\pm$ 144.8        | -8.0   | 1.6    |
| Bile   | 10,000                   | 10,043.3 $\pm$ 241.0      | 0.4    | 2.4    |

**Table S2.** The carry-over test for **25a** in rat plasma, urine, feces and bile. Data were presented as the mean  $\pm$  SD (n = 6).

| Matrix | DB <sup>1</sup> Area (cps) | LLOQ Area (cps) | Carryover        |
|--------|----------------------------|-----------------|------------------|
| Plasma | 129 $\pm$ 16               | 1177 $\pm$ 131  | 11.0% $\pm$ 1.0% |
| Urine  | 236 $\pm$ 37               | 1903 $\pm$ 100  | 12.4% $\pm$ 2.3% |
| Feces  | 181 $\pm$ 63               | 1823 $\pm$ 186  | 9.9% $\pm$ 3.2%  |
| Bile   | 215 $\pm$ 52               | 1752 $\pm$ 515  | 12.3% $\pm$ 3.0% |

<sup>1</sup> DB: Double blank sample following a ULOQ sample

**Table S3.** Mean plasma concentration data of **25a** in rats after a single oral dose at 25, 50 and 100 mg/kg and multiple doses at 100 mg/kg. Data were presented as the mean  $\pm$  SD (ng/mL, n = 6).

| Time (h) | Single <i>p.o.</i> 25 mg/kg | Single <i>p.o.</i> 50 mg/kg | Single <i>p.o.</i> 100 mg/kg | Multiple <i>p.o.</i> 100 mg/kg |
|----------|-----------------------------|-----------------------------|------------------------------|--------------------------------|
| 0.083    | 281.5 $\pm$ 62.3            | 236.3 $\pm$ 93.5            | 1078.4 $\pm$ 286.8           | 681.3 $\pm$ 97.0               |
| 0.167    | 430.7 $\pm$ 115.8           | 379.7 $\pm$ 173.4           | 1324.0 $\pm$ 234.6           | 935.6 $\pm$ 101.8              |
| 0.25     | 515.0 $\pm$ 122.5           | 495.7 $\pm$ 211.4           | 1211.0 $\pm$ 196.1           | 1089.5 $\pm$ 191.7             |
| 0.5      | 167.0 $\pm$ 33.5            | 693.2 $\pm$ 271.5           | 1034.4 $\pm$ 124.4           | 1264.0 $\pm$ 168.2             |
| 1        | 244.7 $\pm$ 92.5            | 428.8 $\pm$ 149.2           | 733.6 $\pm$ 134.2            | 1411.4 $\pm$ 282.9             |
| 2        | 206.2 $\pm$ 83.7            | 453.7 $\pm$ 97.6            | 687.4 $\pm$ 145.8            | 1711.7 $\pm$ 185.0             |
| 4        | 372.5 $\pm$ 74.3            | 553.3 $\pm$ 97.8            | 1129.2 $\pm$ 245.4           | 1075.2 $\pm$ 110.2             |
| 6        | 229.8 $\pm$ 49.7            | 382.8 $\pm$ 165.8           | 834.6 $\pm$ 178.5            | 717.4 $\pm$ 195.7              |
| 8        | 101.8 $\pm$ 7.7             | 271.0 $\pm$ 75.1            | 595.6 $\pm$ 126.4            | 493.7 $\pm$ 111.2              |
| 12       | 36.8 $\pm$ 2.7              | 78.3 $\pm$ 36.1             | 172.9 $\pm$ 36.7             | 244.8 $\pm$ 73.6               |
| 24       | 2.1 $\pm$ 1.3               | 3.6 $\pm$ 1.1               | 10.9 $\pm$ 6.6               | 28.1 $\pm$ 85.9                |

**Table S4.** Tissue distribution parameters of **25a** in rats after a single oral dose at 100 mg/kg. Data were presented as the mean  $\pm$  SD (n = 4).

| Tissue | t <sub>1/2</sub> (h) | T <sub>max</sub> (h) | C <sub>max</sub> (ng/mL) | AUC <sub>0-t</sub> (ng/mL*h) | K <sub>p</sub> - |
|--------|----------------------|----------------------|--------------------------|------------------------------|------------------|
| Brain  | 6.1 $\pm$ 2.8        | 0.9 $\pm$ 0.6        | 819.5 $\pm$ 768.7        | 1393.4 $\pm$ 602.4           | 0.27             |
| Heart  | 3.5 $\pm$ 0.6        | 0.8 $\pm$ 0.7        | 631.3 $\pm$ 64.8         | 4163.1 $\pm$ 1006.9          | 0.80             |
| Lung   | 3.6 $\pm$ 0.7        | 0.4 $\pm$ 0.1        | 1128.8 $\pm$ 1005.5      | 3717.9 $\pm$ 880.5           | 0.72             |
| Liver  | 6.3 $\pm$ 3.4        | 3.6 $\pm$ 2.5        | 183.3 $\pm$ 143.8        | 1648.3 $\pm$ 1000.1          | 0.22             |
| Spleen | 4.5 $\pm$ 0.8        | 0.9 $\pm$ 0.6        | 933.8 $\pm$ 792.8        | 4268.3 $\pm$ 2625.5          | 0.82             |
| Kidney | 4.2 $\pm$ 0.8        | 0.4 $\pm$ 0.1        | 1478.8 $\pm$ 472.9       | 8673.5 $\pm$ 1507.1          | 1.67             |
| Muscle | 3.2 $\pm$ 0.4        | 0.8 $\pm$ 0.7        | 727.5 $\pm$ 215.8        | 4000.0 $\pm$ 790.5           | 0.79             |
| Skin   | 3.6 $\pm$ 0.5        | 2.6 $\pm$ 2.1        | 701.3 $\pm$ 123.5        | 4833.9 $\pm$ 1084.6          | 0.93             |
| Fat    | 6.6 $\pm$ 4.2        | 1.3 $\pm$ 0.8        | 333.4 $\pm$ 238.5        | 1573.4 $\pm$ 650.2           | 0.31             |
| Testis | NA                   | 6.0 $\pm$ 0.0        | 50.6 $\pm$ 26.4          | 337.6 $\pm$ 143.9            | 0.06             |
| Bone   | 3.7 $\pm$ 0.5        | 1.1 $\pm$ 0.9        | 412.8 $\pm$ 149.7        | 2680.0 $\pm$ 660.3           | 0.40             |
| Plasma | 5.7 $\pm$ 4.8        | 0.3 $\pm$ 0.0        | 1121.3 $\pm$ 131.9       | 5197.6 $\pm$ 1591.9          | 1.00             |

<sup>1</sup> NA: Not Available for no enough drug concentrations

**Table S5.** Urine excretion profile of **25a** in rats a single oral dose 100 mg/kg. Data were presented as the mean  $\pm$  SD (n = 4).

| Timepoint (h) | Urine (mL)     | Concentration (ng/mL) | Accumulated Amount (mg) | The cumulative excretion ratio (%) |
|---------------|----------------|-----------------------|-------------------------|------------------------------------|
| 0-6           | 7.3 $\pm$ 3.0  | 1865.0 $\pm$ 576.4    | 0.0129 $\pm$ 0.0059     | 0.051 $\pm$ 0.021                  |
| 6-12          | 6.5 $\pm$ 1.5  | 1696.3 $\pm$ 1,244.3  | 0.0221 $\pm$ 0.0046     | 0.089 $\pm$ 0.018                  |
| 12-24         | 9.1 $\pm$ 2.2  | 869.3 $\pm$ 442.0     | 0.0305 $\pm$ 0.0066     | 0.125 $\pm$ 0.037                  |
| 24-36         | 8.3 $\pm$ 2.6  | 132.4 $\pm$ 108.1     | 0.0317 $\pm$ 0.0077     | 0.131 $\pm$ 0.042                  |
| 36-48         | 9.8 $\pm$ 2.7  | 104.4 $\pm$ 95.7      | 0.0327 $\pm$ 0.0085     | 0.135 $\pm$ 0.047                  |
| 48-60         | 9.8 $\pm$ 2.8  | 49.6 $\pm$ 31.9       | 0.0332 $\pm$ 0.0089     | 0.137 $\pm$ 0.049                  |
| 60-72         | 14.9 $\pm$ 6.4 | 32.5 $\pm$ 11.2       | 0.0337 $\pm$ 0.0090     | 0.139 $\pm$ 0.049                  |

**Table S6.** Fecal excretion profile of **25a** in rats a single oral dose 100 mg/kg. Data were presented as the mean  $\pm$  SD (n = 4).

| Timepoint (h) | Feces (g)      | Concentration (ng/mL) | Accumulated Amount (mg) | The cumulative excretion ratio (%) |
|---------------|----------------|-----------------------|-------------------------|------------------------------------|
| 0-6           | 7.7 $\pm$ 0.8  | 6547.5 $\pm$ 1407.8   | 0.248 $\pm$ 0.056       | 1.009 $\pm$ 0.233                  |
| 6-12          | 7.1 $\pm$ 2.0  | 9237.5 $\pm$ 2337.8   | 0.565 $\pm$ 0.130       | 2.261 $\pm$ 0.383                  |
| 12-24         | 7.1 $\pm$ 2.0  | 6053.3 $\pm$ 4545.2   | 0.798 $\pm$ 0.309       | 3.139 $\pm$ 0.954                  |
| 24-36         | 3.6 $\pm$ 1.0  | 188.2 $\pm$ 121.9     | 0.802 $\pm$ 0.310       | 3.153 $\pm$ 0.957                  |
| 36-48         | 9.8 $\pm$ 1.7  | 7.0 $\pm$ 8.8         | 0.802 $\pm$ 0.310       | 3.155 $\pm$ 0.956                  |
| 48-60         | 4.7 $\pm$ 3.0  | 2.1 $\pm$ 3.1         | 0.802 $\pm$ 0.310       | 3.155 $\pm$ 0.956                  |
| 60-72         | 13.0 $\pm$ 4.0 | 3.8 $\pm$ 3.8         | 0.802 $\pm$ 0.310       | 3.156 $\pm$ 0.955                  |

**Table S7.** Bile excretion profile of **25a** in rats a single oral dose 100 mg/kg. Data were presented as the mean  $\pm$  SD (n = 4).

| Timepoint (h) | Bile (mL)      | Concentration (ng/mL) | Accumulated Amount ( $\mu$ g) | The cumulative excretion ratio (%) |
|---------------|----------------|-----------------------|-------------------------------|------------------------------------|
| 0-2           | 2.4 $\pm$ 0.9  | 220.5 $\pm$ 44.4      | 0.531 $\pm$ 0.233             | 0.0022 $\pm$ 0.0011                |
| 0-4           | 3.2 $\pm$ 0.6  | 192.3 $\pm$ 52.3      | 1.138 $\pm$ 0.434             | 0.0048 $\pm$ 0.0022                |
| 0-6           | 1.8 $\pm$ 0.5  | 161.3 $\pm$ 55.4      | 1.451 $\pm$ 0.481             | 0.0061 $\pm$ 0.0023                |
| 0-8           | 1.9 $\pm$ 0.5  | 169.5 $\pm$ 57.2      | 1.783 $\pm$ 0.489             | 0.0074 $\pm$ 0.0023                |
| 0-10          | 2.7 $\pm$ 0.9  | 156.8 $\pm$ 23.8      | 2.215 $\pm$ 0.603             | 0.0092 $\pm$ 0.0026                |
| 0-12          | 4.7 $\pm$ 3.0  | 147.3 $\pm$ 27.7      | 2.888 $\pm$ 0.929             | 0.0120 $\pm$ 0.0043                |
| 0-24          | 9.9 $\pm$ 3.6  | 83.5 $\pm$ 19.9       | 3.664 $\pm$ 1.010             | 0.0152 $\pm$ 0.0045                |
| 0-36          | 12.3 $\pm$ 3.2 | 40.7 $\pm$ 21.1       | 4.113 $\pm$ 1.058             | 0.0171 $\pm$ 0.0049                |
| 0-48          | 9.0 $\pm$ 2.5  | 17.9 $\pm$ 17.1       | 4.300 $\pm$ 1.184             | 0.0179 $\pm$ 0.0057                |
